# Supplementary material for: One-pot construction of doxorubicin conjugated magnetic silica nanoparticles
Source: Royal Society of Chemistry journal article supplement (doi:10.1039/b9nj00342h), 2009-01-01
Supplement: b9nj00342h.pdf [file b9nj00342h.pdf]

## One-Pot Construction of Doxorubicin Conjugated Magnetic Silica Nanoparticles

Shouzhu Li, Yan Ma, Xiuli Yue, Zhong Cao, Zhifei Dai\*

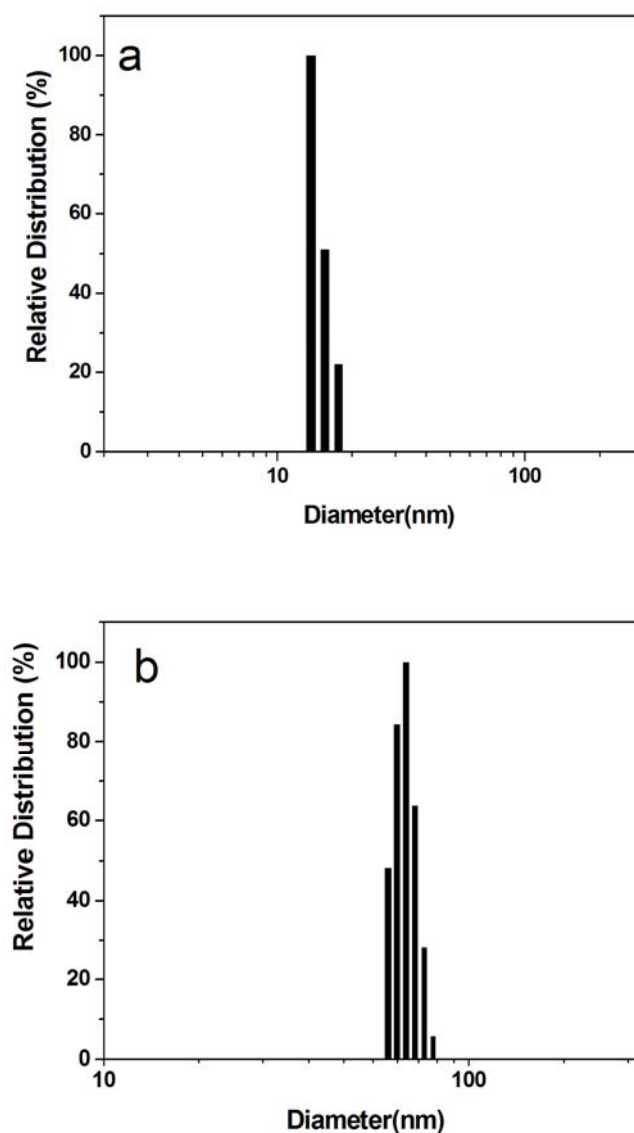

**Figure S1.** DLS size distribution profiles: (a) the citric acid modified  $\text{Fe}_3\text{O}_4$  nanoparticles, (b) the DOX- $\text{Fe}_3\text{O}_4$ - $\text{SiO}_2$  nanoparticles.

The DLS size distribution profile of the citric-acid-modified magnetic nanoparticles is shown that the modified magnetic nanoparticles are well dispersed (Figure S1a). The average particle size is about 13.7 nm with a narrow size distribution.

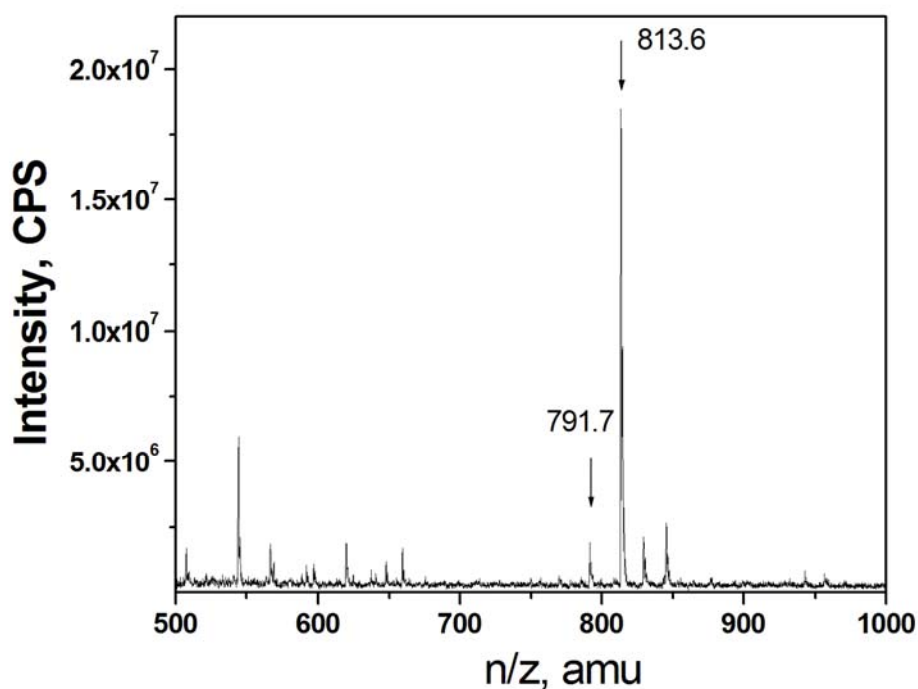

**Figure S2.** Mass spectra of the mixture of DOX and ICPTES after sonication.

The obtained Fe<sub>3</sub>O<sub>4</sub> nanoparticles were then mixed with DOX·HCl and ICPTES by ultrasonication in aqueous solution. The formation of the intermediate of DOX and ICPTES was proved by mass spectra ( $m/z$ : calcd for C<sub>37</sub>H<sub>50</sub>N<sub>2</sub>O<sub>15</sub>Si: 790.88; found: 791.7 [M+H]<sup>+</sup> and 813.6 [M+Na]<sup>+</sup>) (Figure S2). Then, sol-gel processes (Si-OCH<sub>3</sub>CH<sub>2</sub> + H<sub>2</sub>O → Si-OH + CH<sub>3</sub>CH<sub>2</sub>OH followed by Si-OH + Si-OH → Si-O-Si + H<sub>2</sub>O) occurred on the surface of Fe<sub>3</sub>O<sub>4</sub> nanoparticles, resulting in the DOX-SiO<sub>2</sub>-Fe<sub>3</sub>O<sub>4</sub> nanoparticles. The DLS measurement showed that the mean diameter of the coated particle is about 66.9 nm with a narrow size distribution (Figure S1b).
